# Supplementary material for: Planificació del vídeo accessible
Source: Royal Society of Chemistry journal article supplement (doi:10.1039/c4fo00255e), 2013-03-01
Supplement: c4fo00255e1.pdf [file c4fo00255e1.pdf]

## Tumor Incidence (%)

The percentage of tumor incidence in both ventral and dorsolateral prostate is summarized in Fig. 1. MNU + T-treated rats showed hyperplasia, dysplasia and prostatic intraepithelial neoplasia. No tumor incidence was observed in rats treated with quercetin alone and control rats.

Fig. 1

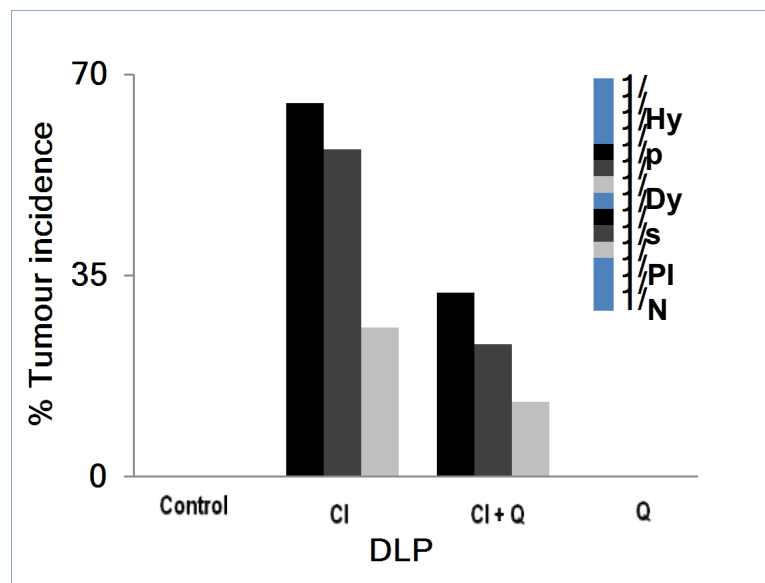

A) DLP

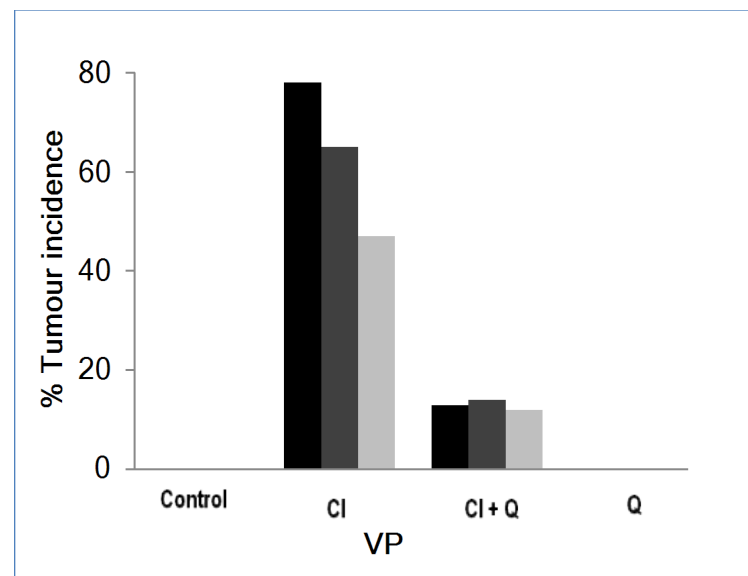

B) VP
